# Supplementary material for: ZIF-derived nitrogen-doped carbon/3D graphene frameworks for all-solid-state supercapacitors
Source: Royal Society of Chemistry journal article supplement (doi:10.1039/c6ra16153g), 2016-01-01
Supplement: c6ra16153g1.pdf [file c6ra16153g1.pdf]

## Supplementary Information

for

### ZIF-derived nitrogen-doped carbon/3D graphene frameworks for all-solid-state supercapacitors

Li Wan, Jing Wei, Yan Liang, Yaoxin Hu, Xiaofang Chen, Ezzatollah Shamsaei, Ranwen Ou, Xiwang Zhang, Huanting Wang\*

Department of Chemical Engineering, Monash University, Clayton, Victoria 3800, Australia.

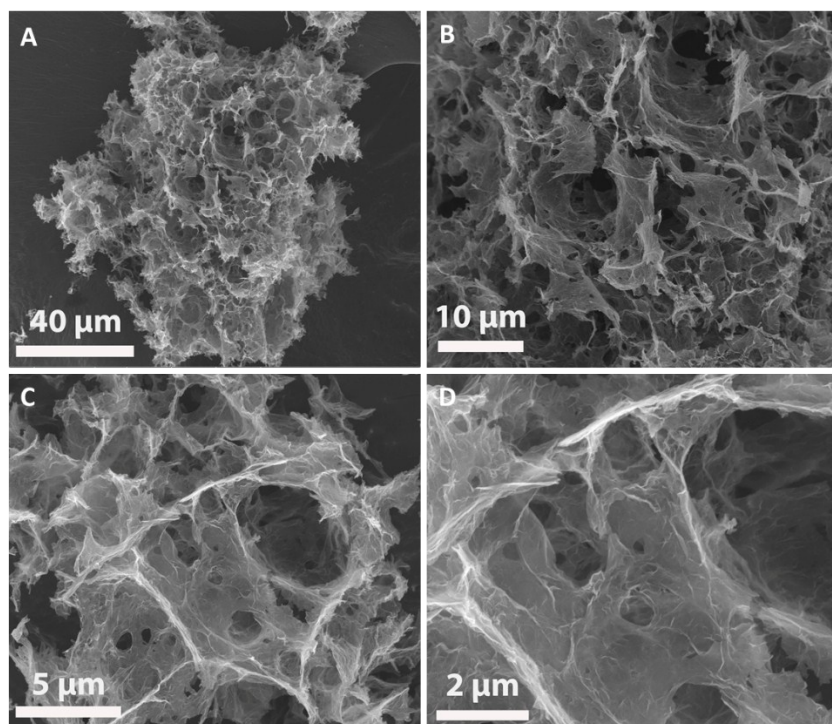

Fig. S1. SEM images of graphene aerogels (GA)

\* Corresponding author. Tel: (61) 3 99053449.  
E-mail: [huanting.wang@monash.edu](mailto:huanting.wang@monash.edu) (Huanting Wang)

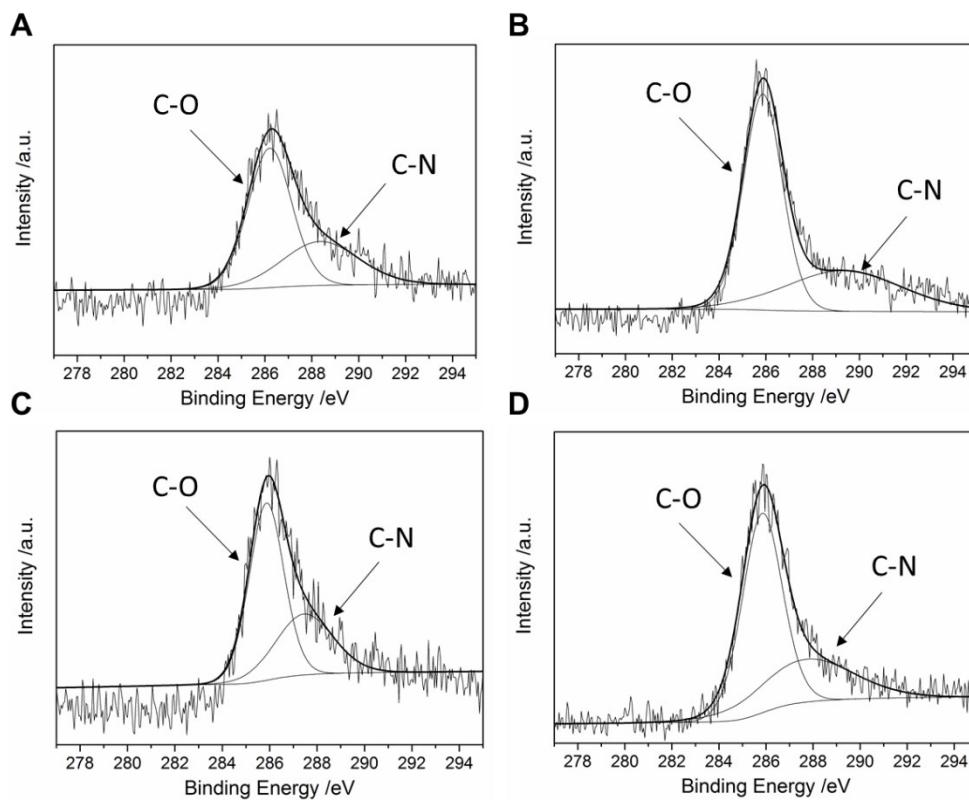

Fig. S2. XPS spectra of C 1s peak of a) CZIF-8-E, b) GA@CZIF-8-E, c) CZIF-67-E and d) GA@CZIF-67-E.

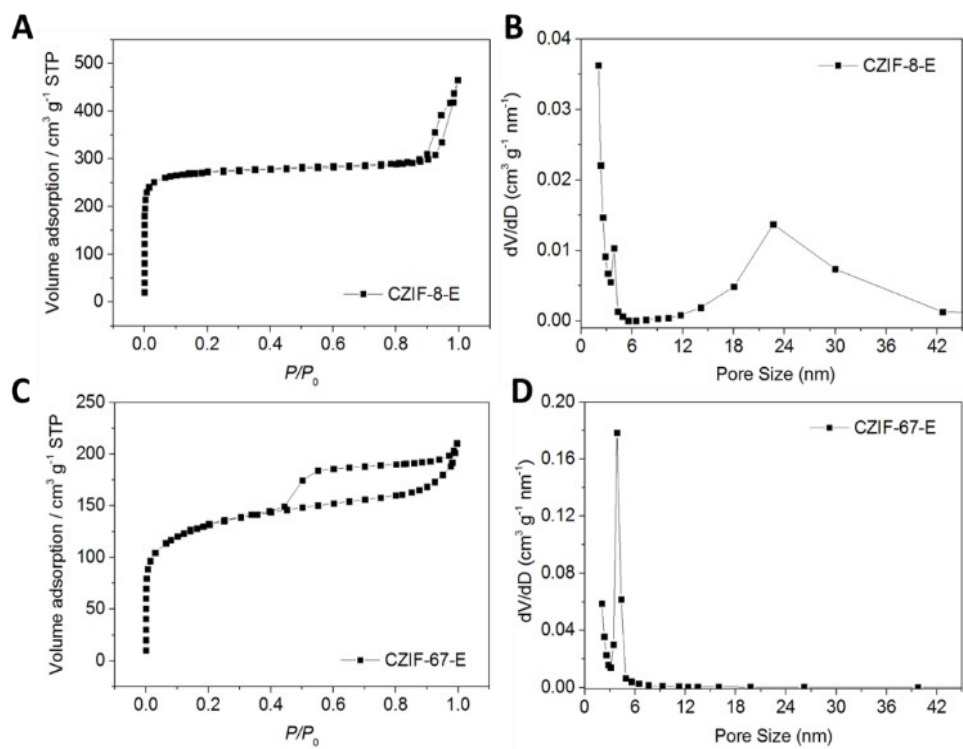

Fig. S3.  $\text{N}_2$  adsorption-desorption isotherms of (a) CZIF-8-E and (c) CZIF-67-E. Pore distribution of (b) CZIF-8-E and (d) CZIF-67-E.

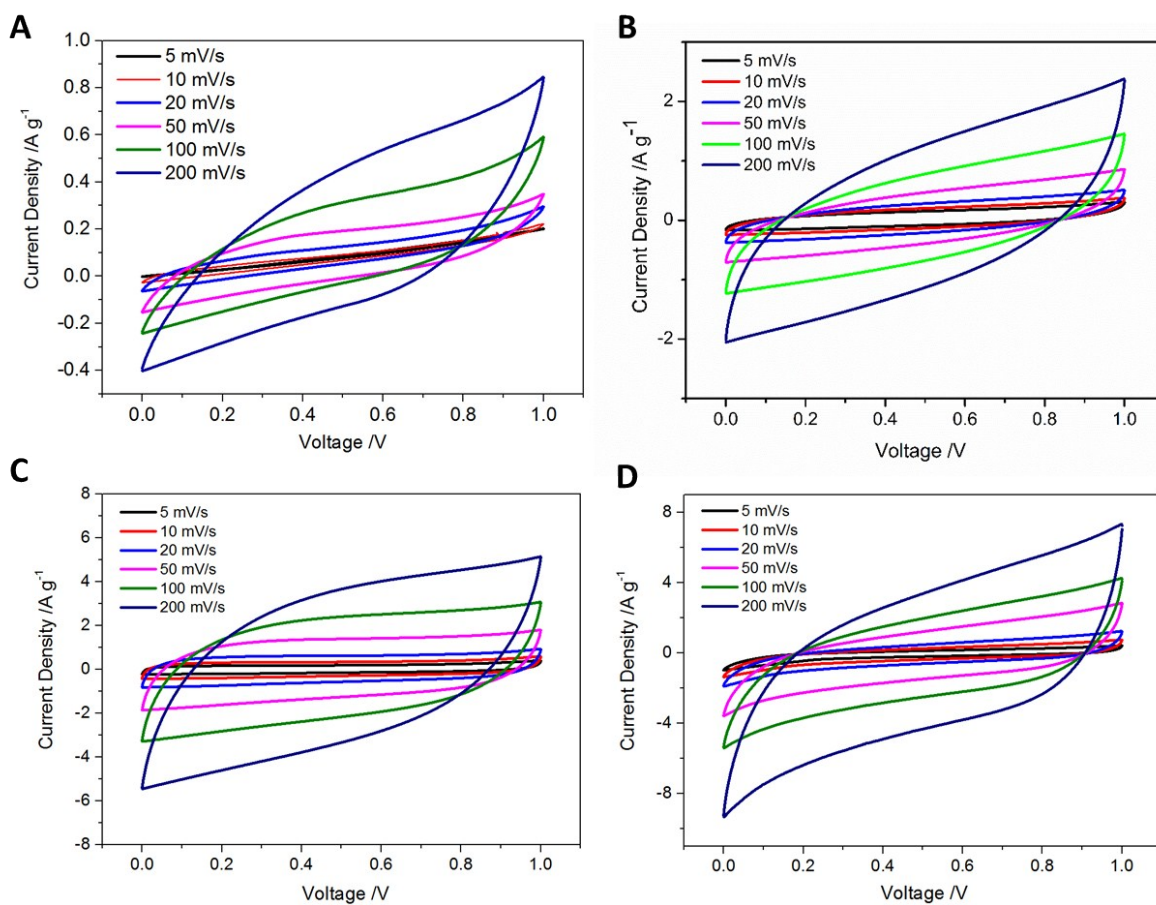

Fig. S4. Electrochemical performance of ASSSs. CVs of (a) CZIF-8-E, (b) CZIF-67-E, (c) GA@CZIF-8-E, and (d) GA@CZIF-67-E based on two-electrode mass measured at different scan rates of 5, 10, 20, 50, 100 and 200 mV s<sup>-1</sup>.

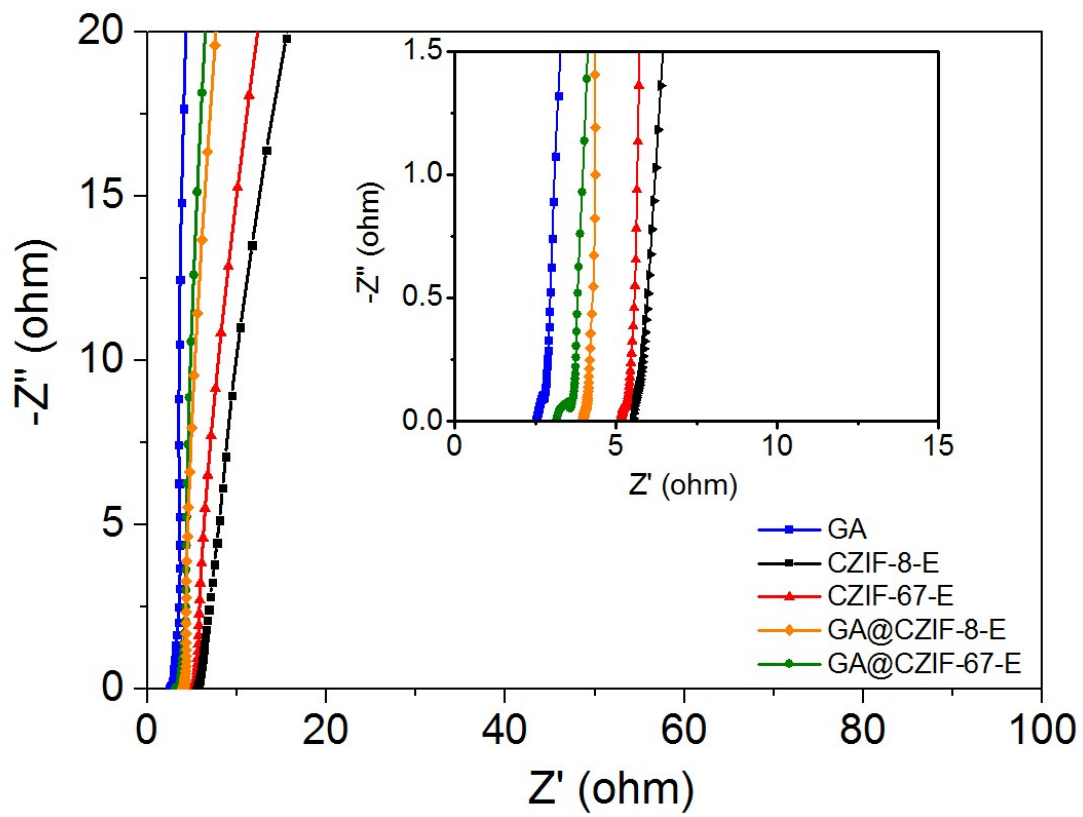

Fig. S5. Nyquist plots of the experimental impedance data for GA, CZIF-8-E, CZIF-67-E, GA@CZIF-8-E, and GA@CZIF-67-E; inset is a zoomed-in view of the high-frequency region in the Nyquist plots.

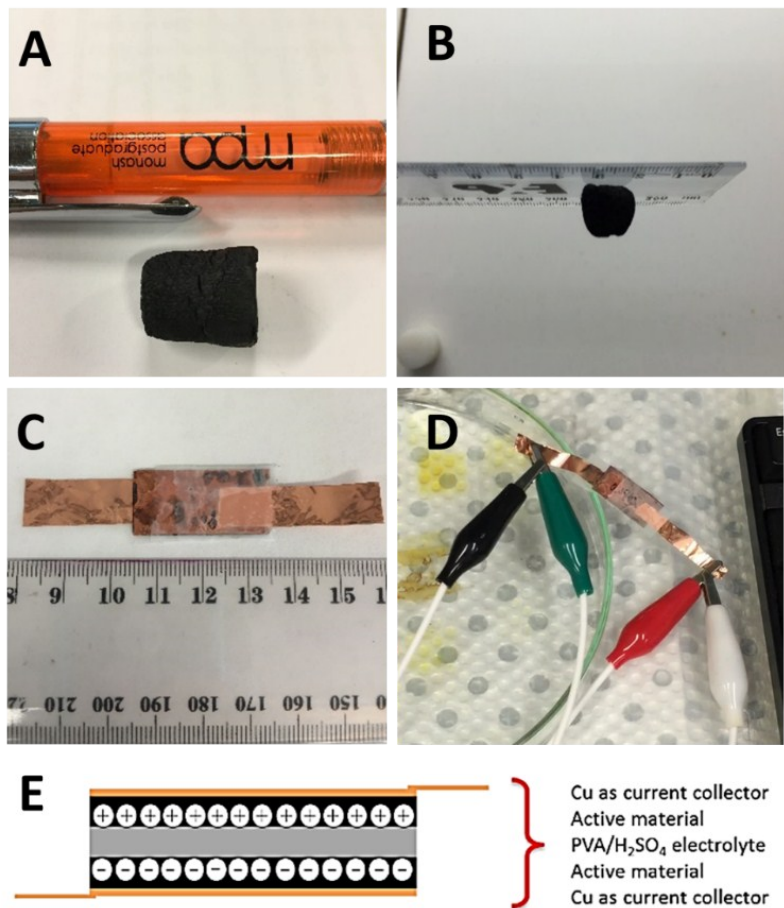

Fig. S6. Photo images of (A-D) GA@CZIF-67-E, and a schematic diagram (E) of all-solid-state supercapacitors.
